# Supplementary material for: Manganese-Based Metal-Organic Frameworks Photocatalysts for Visible Light-Driven Oxidative Coupling of Benzylamine under Atmospheric Oxygen: A Comparative Study
Source: MDPI journal article supplement (doi:10.3390/catal13030613), 2023-03-18
Supplement: s1 [file s1]

## Supporting information

### Section SI: Energy-dispersive X-ray spectroscopy (EDX)

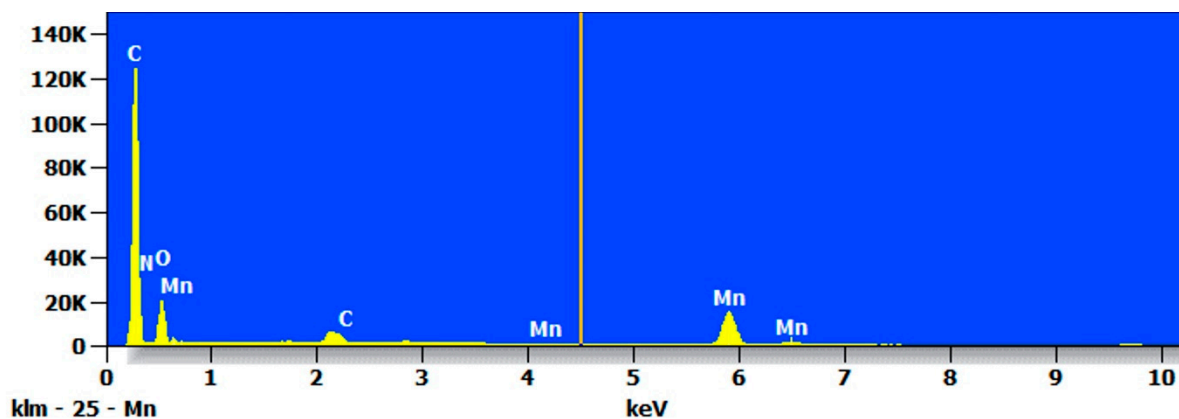

**Figure S1.** EDX spectrum of  $\text{Mn}^{\text{II}}_3(\text{tp})_{6/2}(\text{bpy})_2 \cdot (\text{dmf})$  with presence of elements Mn, N, C, and O in the sample.

**Table S1.** Atomic percentages of  $\text{Mn}^{\text{II}}_3(\text{tp})_{6/2}(\text{bpy})_2 \cdot (\text{dmf})$ .

| Element | Weight % | Atom % |
|---------|----------|--------|
| C       | 39.84    | 54.41  |
| O       | 26.71    | 28.20  |
| N       | 8.65     | 8.64   |
| Mn      | 24.80    | 8.75   |

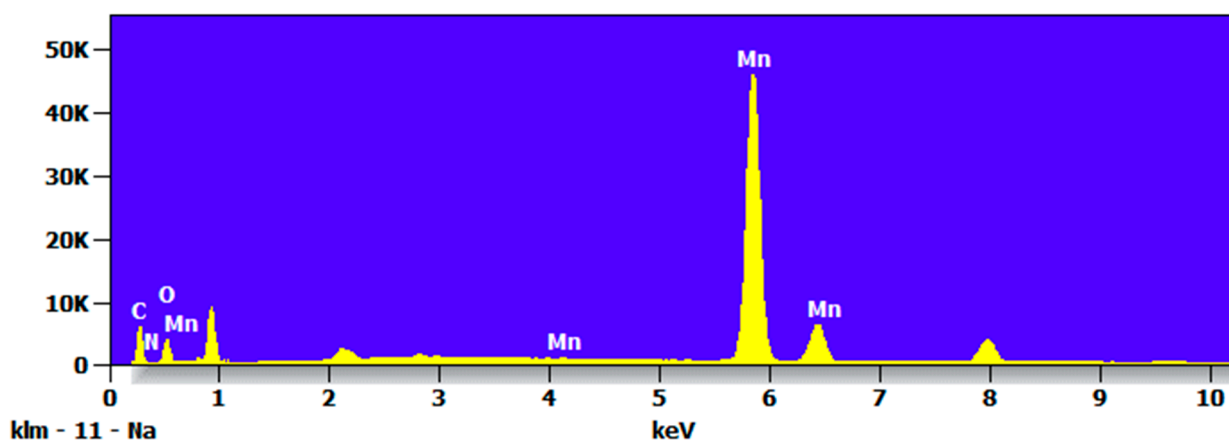

**Figure S2.** EDX spectrum of  $\text{Mn}_2(\text{tpa})_2(\text{dmef})_2$  showing the elements Mn, C, O, and N in the sample.

**Table S2.** Atomic percentages of  $\text{Mn}_2(\text{tpa})_2(\text{dmef})_2$ .

| Element | Weight % | Atom % |
|---------|----------|--------|
| C       | 10.31    | 26.26  |
| O       | 8.94     | 17.09  |
| N       | 7.17     | 15.66  |
| Mn      | 73.59    | 40.99  |

## Section SII: Diffuse reflectance spectroscopy (DRS)

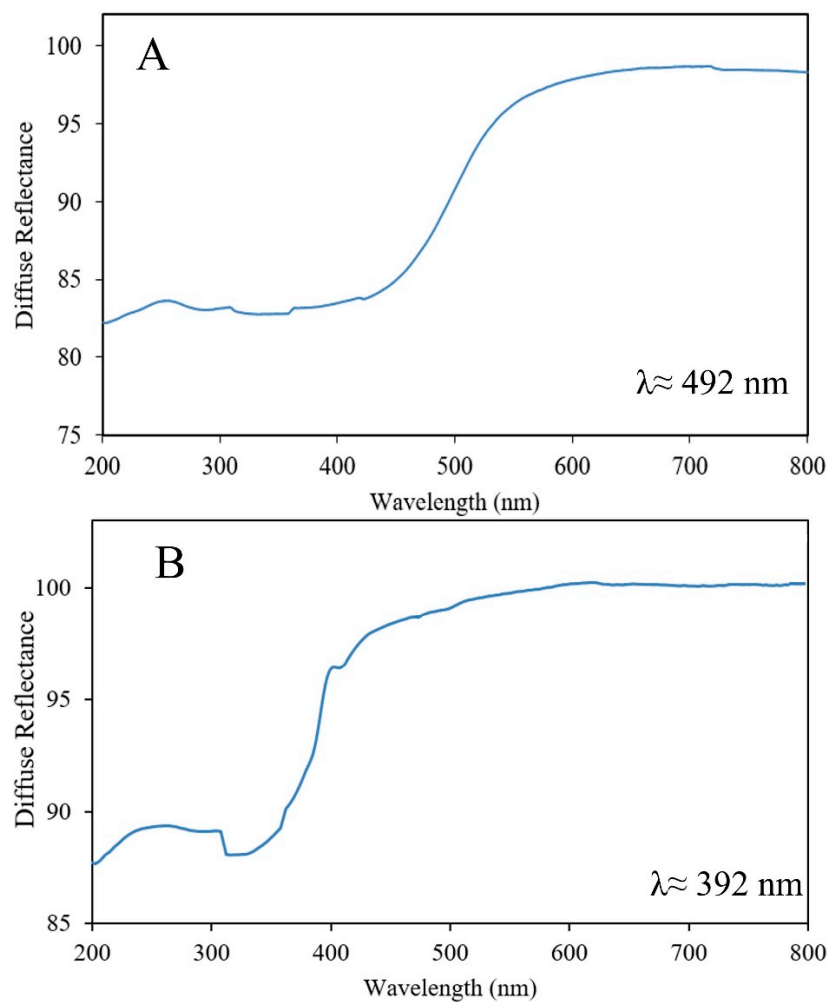

**Figure S3.** The diffuse reflectance spectrum of  $\text{Mn}^{\text{II}}_3(\text{tp})_{6/2}(\text{bpy})_2(\text{dmf})$  (A) and  $\text{Mn}_2(\text{tpa})_2(\text{dmf})_2$  (B).

## Section SIII: Thermal Gravimetric Analysis

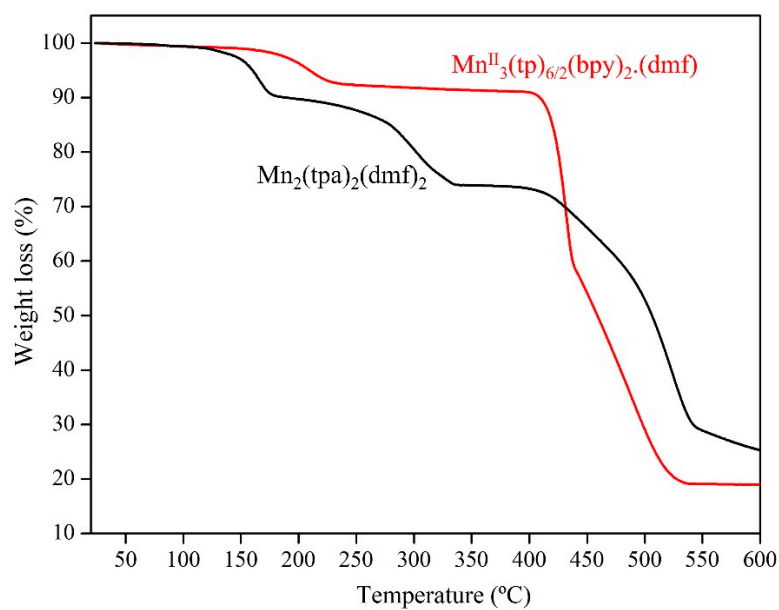

**Figure S4.** Thermogravimetric analysis of  $\text{Mn}^{\text{II}}_3(\text{tp})_{6/2}(\text{bpy})_2 \cdot (\text{dmf})$  and  $\text{Mn}_2(\text{tpa})_2(\text{dmf})_2$  under nitrogen flow and 10 °C min<sup>-1</sup> heating rate.

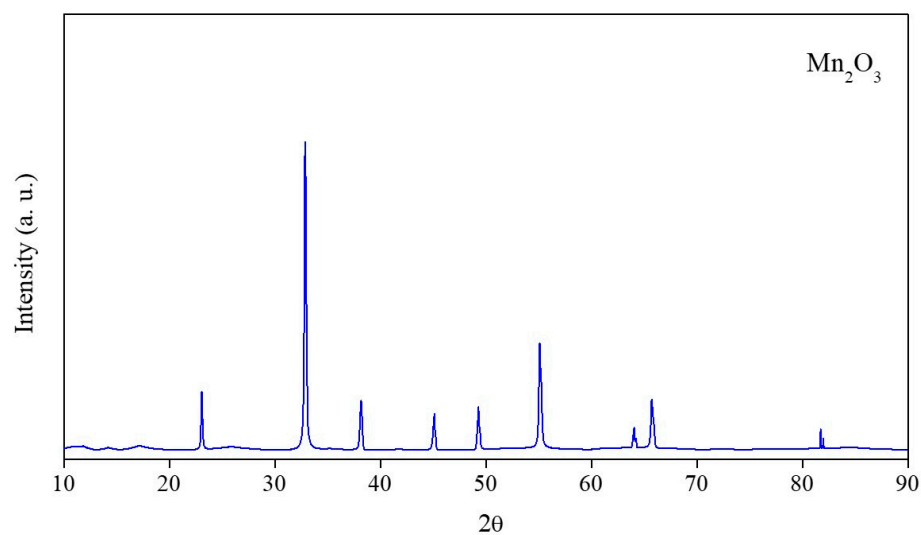

**Figure S5.** The PXRD pattern of obtained  $\text{Mn}_2\text{O}_3$  from calcinated Mn-MOFs through TGA analysis.

#### Section SIV: NMR spectra

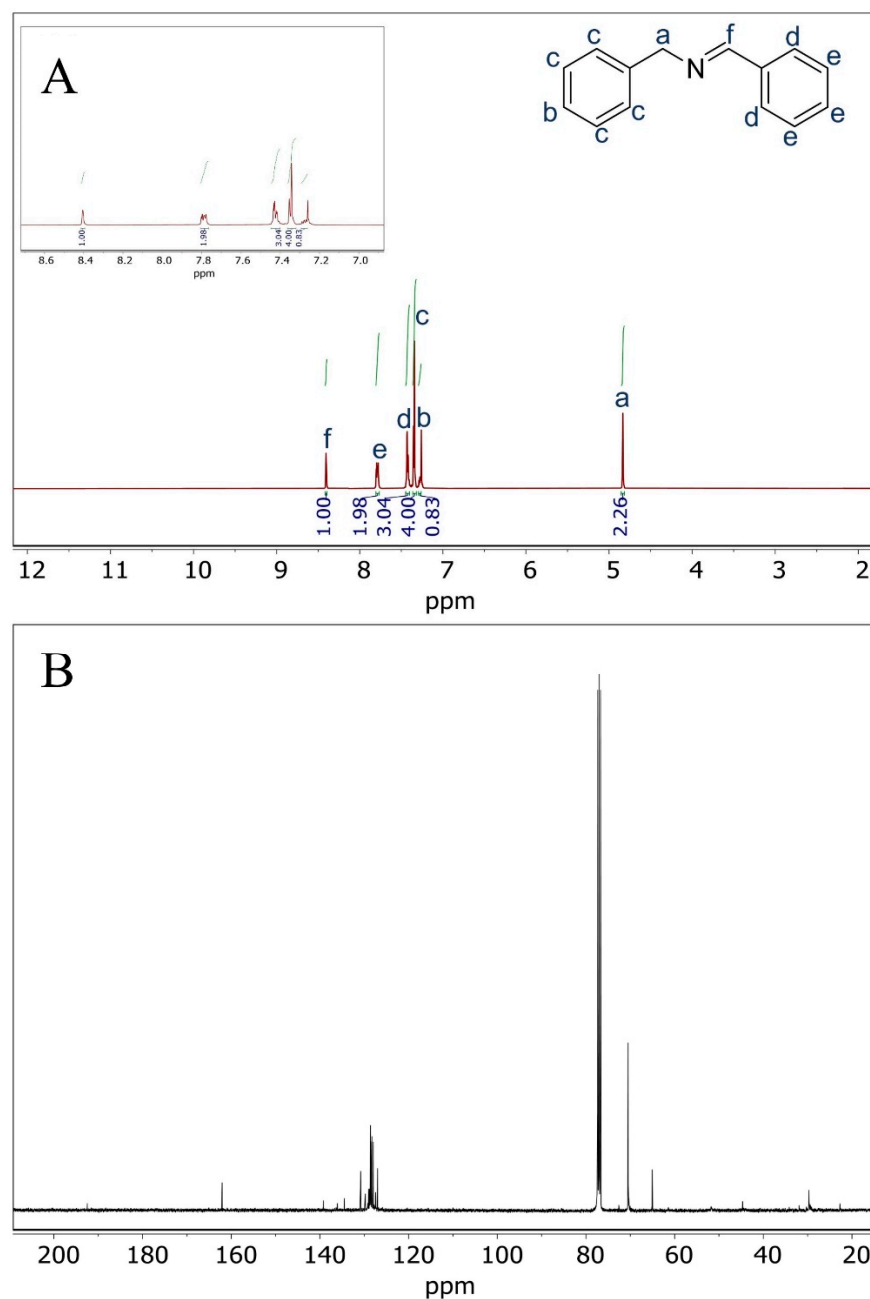

**Figure S6.** <sup>1</sup>H-NMR (A) and <sup>13</sup>C-NMR (B) Spectra of *N*-benzylidenebenzylamine product.

Section SV: FTIR spectrum

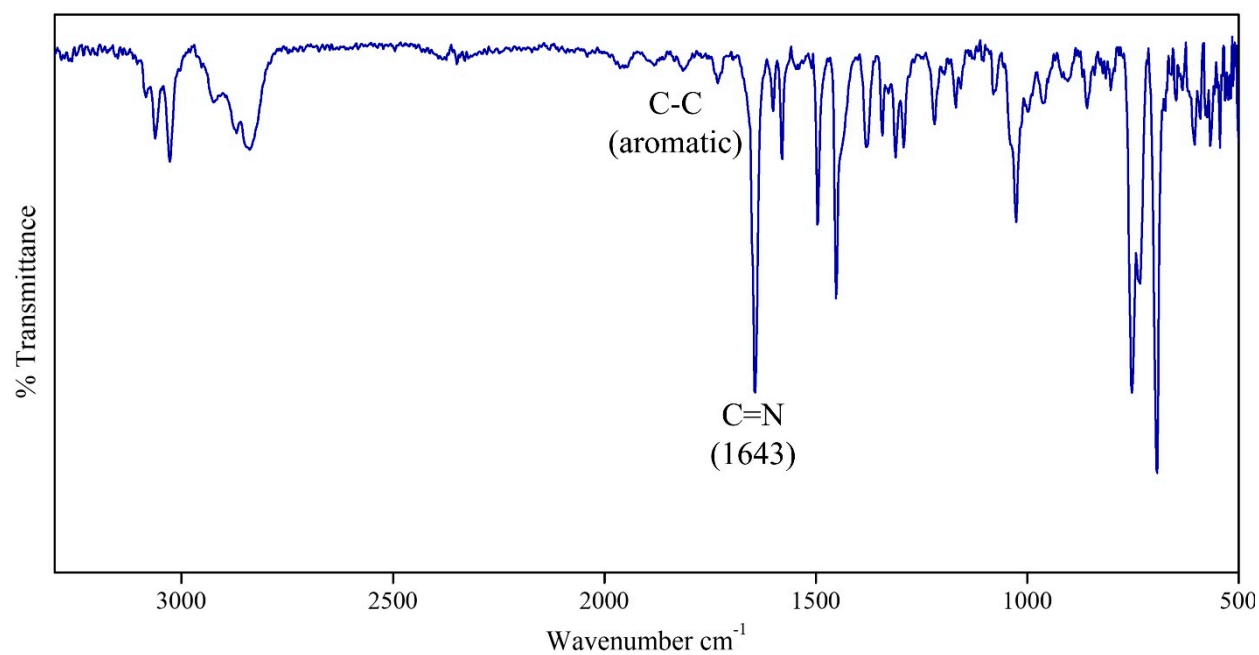

**Figure S7.** FT-IR spectrum of *N*-benzylidenebenzylamine product.
